# Supplementary material
Source: publisher figshare collection journal article supplement (https://acs.figshare.com/ndownloader/files/5885844)

Catalytic Reduction of Carbonyl Functional Groups in 2-Propanol by Molybdocene  
Hydrides

by

Louis Y. Kuo,\* David M. Finigan, Nicholas N. Tadros

Dept. of Chemistry, Lewis & Clark College, Portland Oregon 97219

SUPPORTING INFORMATION

1. Supporting  $^1\text{H}$  NMR spectrum
  2. Plot of reverse reaction for the oxidation of phenylethyl alcohol to acetophenone.
  3. Plot of dimer to monomer conversion for compound I.
-

This supporting information includes plots for the reverse reaction-the oxidation of phenyl ethyl alcohol, which show the backwards reaction was negligible as well as the dimer-to-monomer conversion in isopropanol- $d_8$ .

Included in this supplementary material are the  $^1\text{H}$  NMR spectra of the hydrogenation of acetophenone with **I** in 2-propanol (A) after evaporation of the solvent. Authentication of the product alcohol (1.4 ppm and 4.9 ppm) was confirmed by addition of the acetophenone (2.5 ppm) (B) followed by 1-phenylethyl alcohol (C). Spectra were taken in  $\text{CDCl}_3$  where the broad peak at 2.8-3.1 ppm is water, and the septet at 3.9 ppm is the residual 2-propanol solvent that was not evaporated.

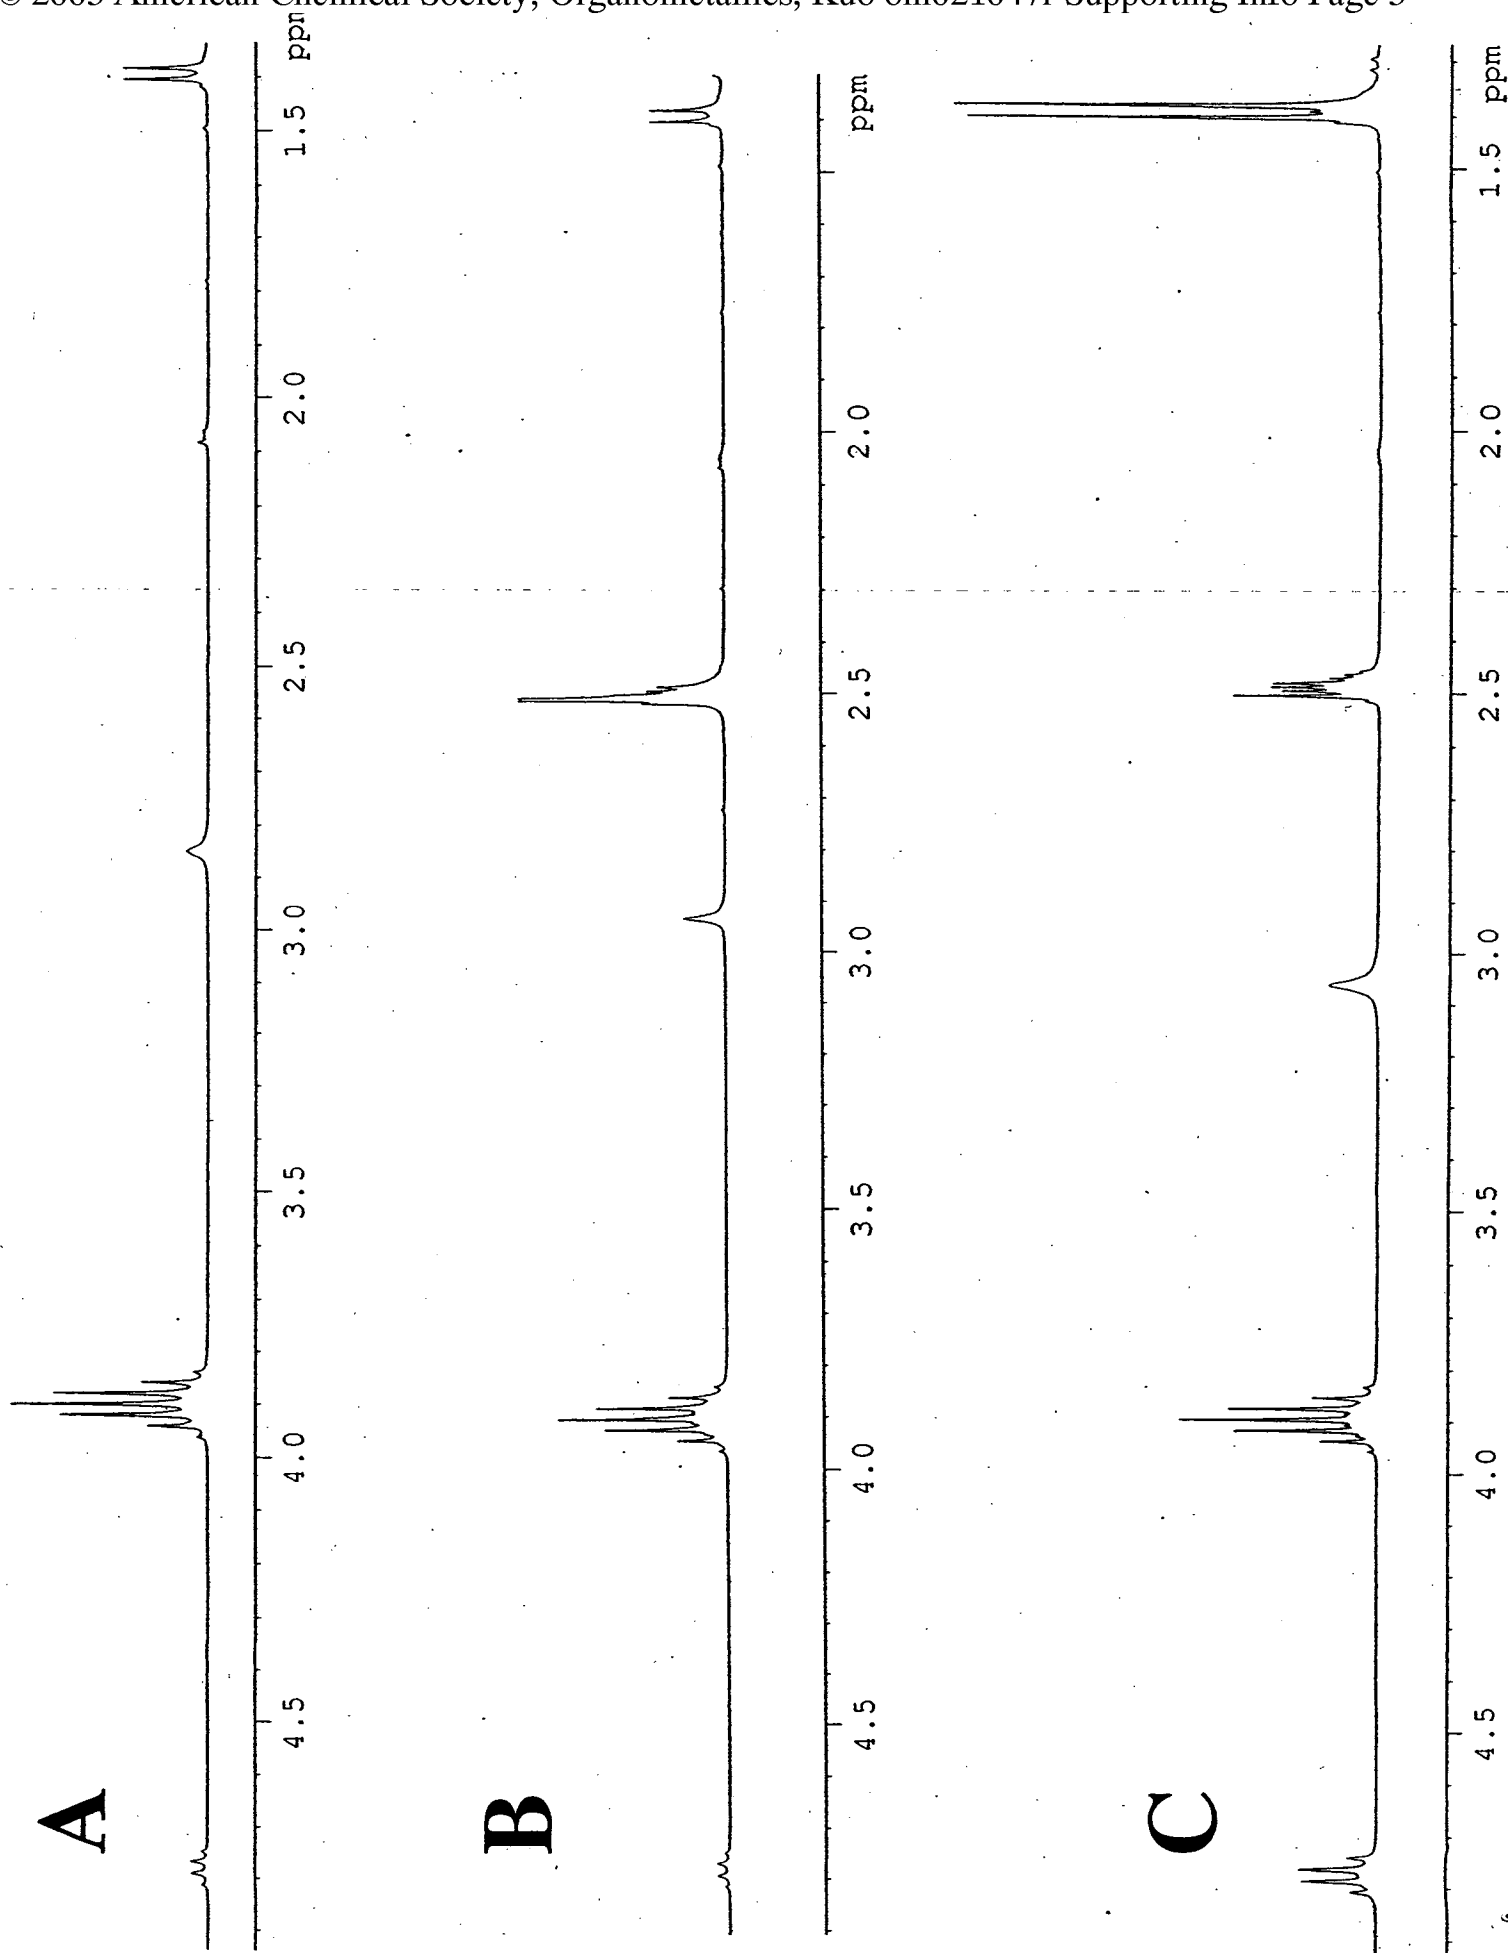

# Backwards Reaction of Phenylethyl Alcohol Oxidation by [Cp2Mo(OH)]2 Dimer

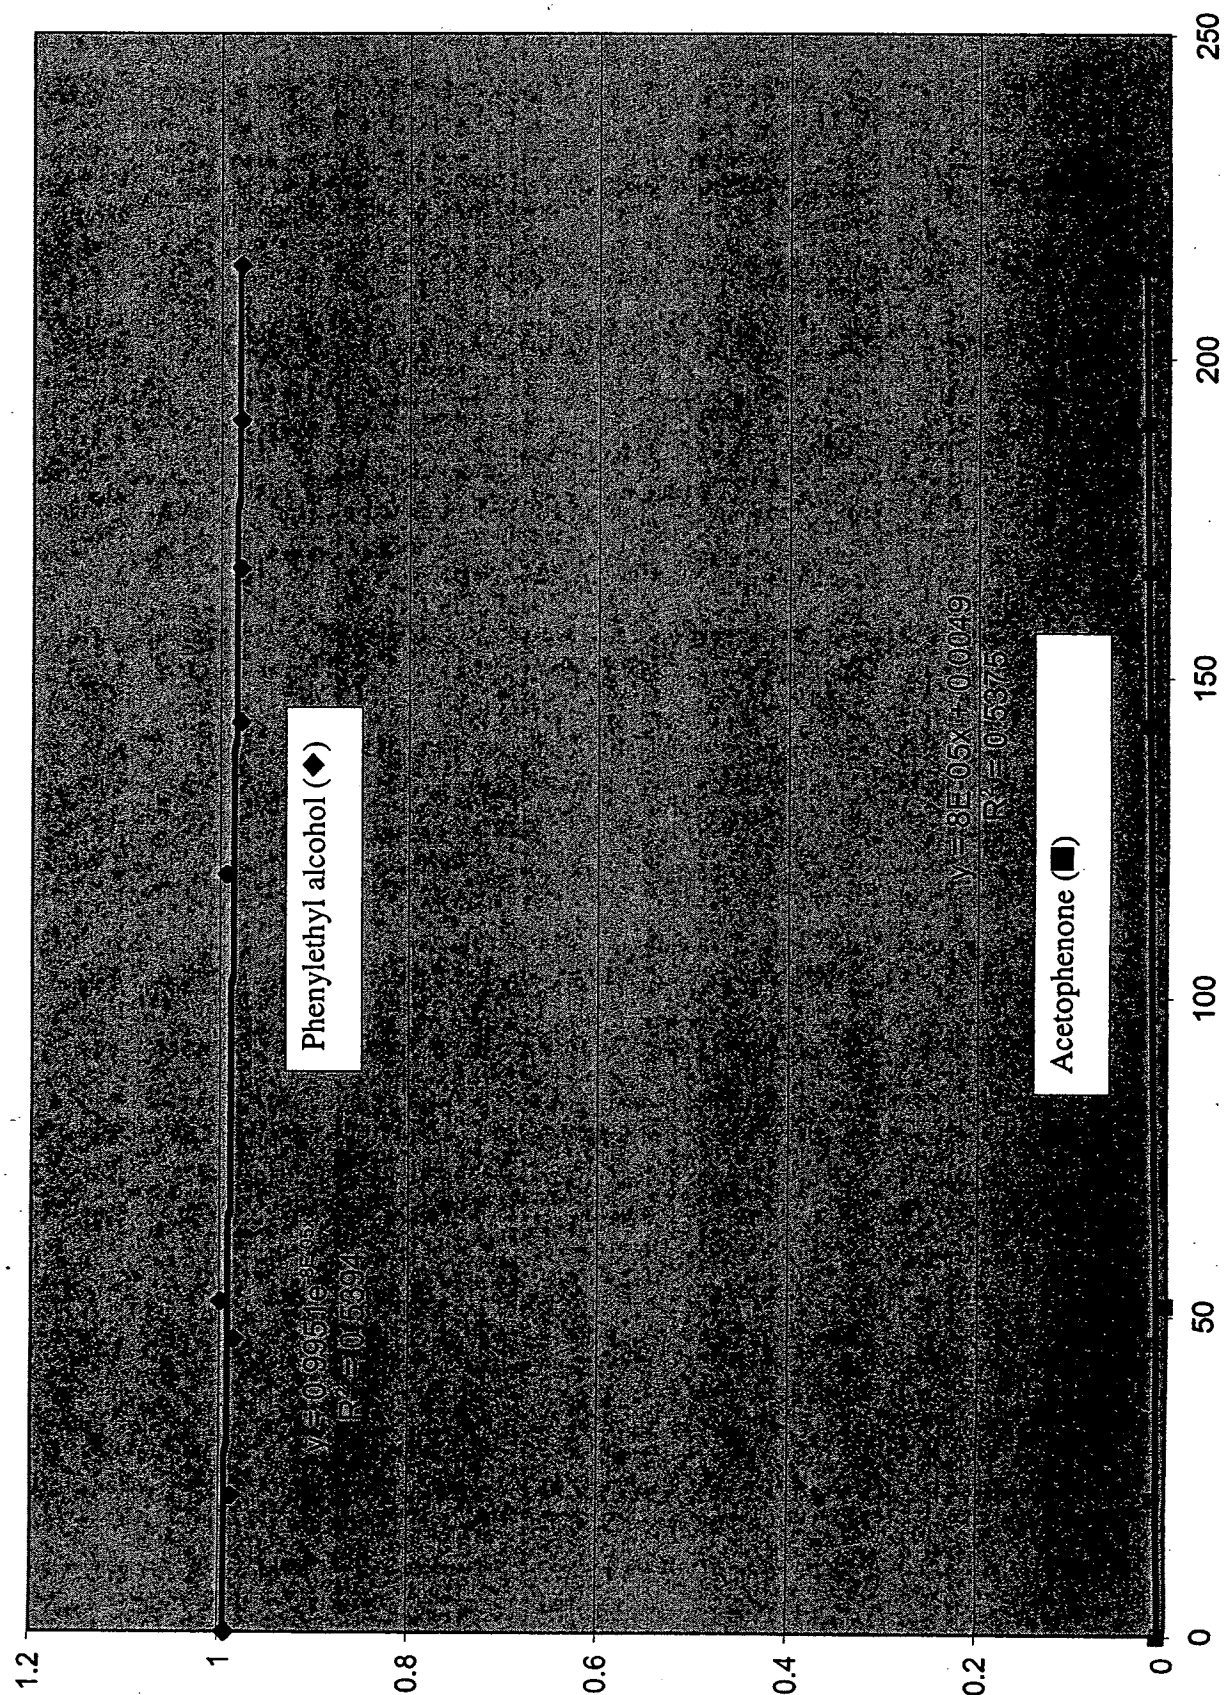

Breakdown of Dimer in 2-propanol- $d_8$  at 65°C. Diamonds represent the dimeric form of molybdocene, and the squares represent the monomeric form. Rate constant for this conversion from dimer to monomer is  $8.95 \times 10^{-2} \text{ sec}^{-1}$

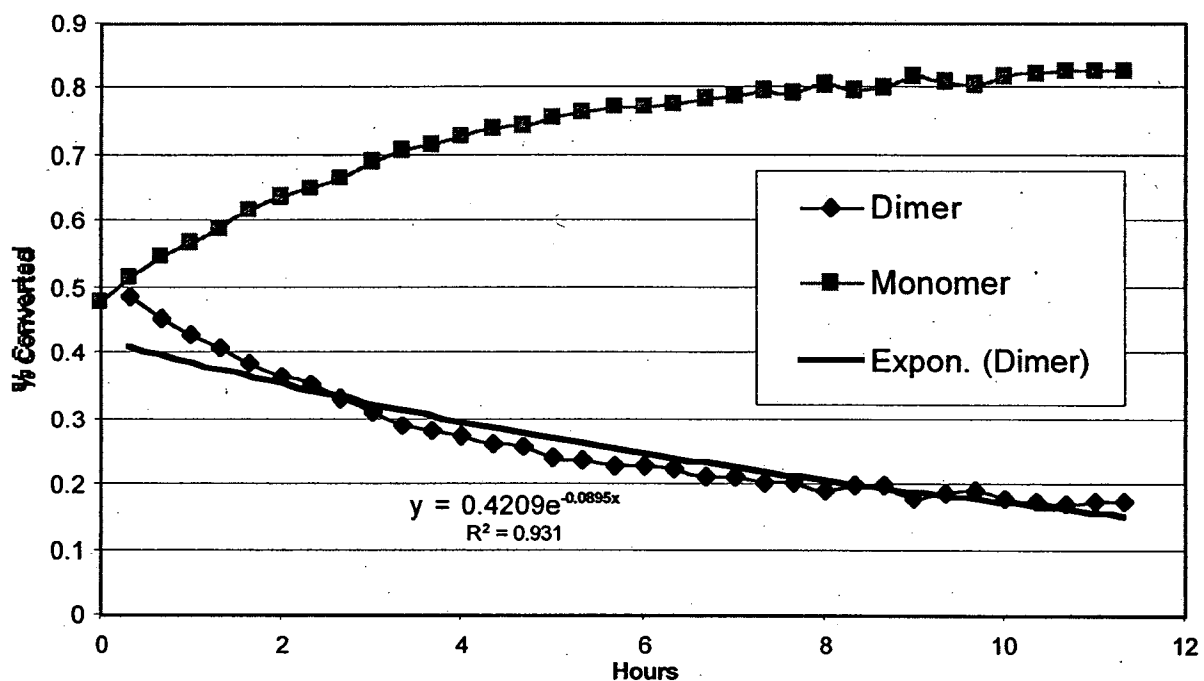

Supplement: Supplementary file 1 [file 5885844]
